# Supplementary material for: Inhibitory activity of chokeberry, bilberry, raspberry and cranberry polyphenol-rich extract towards adipogenesis and oxidative stress in differentiated 3T3-L1 adipose cells
Source: PubMed Central journal article supplement (PMC5705115; doi:10.1371/journal.pone.0188583), 2017-11-28
Supplement: pone.0188583.s001.pdf [file pone.0188583.s001.pdf]

**Table S1.** The primers sequence used for real-time PCR.

| <b>Gene</b>                     | <b>Accession</b> | <b>No. Sequence (5' – 3')</b>                                  | <b>Amplicon (bp)</b> |
|---------------------------------|------------------|----------------------------------------------------------------|----------------------|
| <i>PPAR<math>\gamma</math></i>  | NM-011146        | F: TTT TCA AGG GTG CCA GTT TC<br>R: AAT CCT TGG CCC TCT GAG AT | 198                  |
| <i>C/EBP<math>\alpha</math></i> | NM-007678        | F: TTA CAA CAG GCC AGG TTT CC<br>R: GGC TGG CGA CAT ACA GTA CA | 188                  |
| <i>SREBP1</i>                   | NM-011480        | F: TGT TGG CAT CCT GCT ATC TG<br>R: AGG GAAAGC TTT GGG GTC TA  | 190                  |
| <i>GAPDH</i>                    | NM-008084        | F: AATGAAGGGGTCGTTGATGG<br>R: ATGGTGAAGGTCCGGTGTGAA            | 108                  |
| <i>LPL</i>                      | NM-008509        | F: TCC AAG GAA GCC TTT GAG AA<br>R: CCA TCC TCA GTC CCA GAA AA | 188                  |
| <i>FAS</i>                      | NM-007988        | F: TTG CTG GCA CTA CAG AAT GC<br>R: AAC AGC CTC AGA GCG ACA AT | 192                  |
| <i>PLIN1</i>                    | NM-175640        | F: AAG GAT CCT GCA CCT CAC AC<br>R: CCT CTG CTG AAG GGT TAT CG | 191                  |
| <i>HSL</i>                      | NM-010719        | F: GGA CAC ACA CACACC TG<br>R: CCC TTT CGC AGC AAC TTT AG      | 190                  |
| <i>LEP</i>                      | NM-008493        | F: GGA TCA GGT TTT GTG GTG CT<br>R: TTG TGG CCC ATA AAG TCC TC | 187                  |
| <i>FABP4<br/>(aP2)</i>          | NM-024406        | F: TCA CCT GGA AGA CAG CTC CT<br>R: AAT CCC CAT TTA CGC TGA TG | 182                  |
| <i>ADIPOQ</i>                   | NM-009605        | F: CTGGCCACTTTCTCCTCATTTC<br>R: GGCATGACTGGGCAGGATTA           | 120                  |
| <i>ACTB</i>                     | NM-007393        | F: CCA CAG CTG AGA GGG AAA TC<br>R: AAG GAA GGC TGG AAA AGA GC | 193                  |
